# Supplementary material
Source: PubMed Central journal article supplement (PMC6612630)

YMTHE, Volume 27

## **Supplemental Information**

### ***AKT3* Gene Transfer Promotes Anabolic Reprogramming and Photoreceptor Neuroprotection in a Pre-clinical Model of Retinitis Pigmentosa**

**Devin S. McDougald, Tyler E. Papp, Alexandra U. Zezulin, Shangzhen Zhou, and Jean Bennett**

## Supplemental Information

**Figure S1. AAV.caRheb stimulates mTORC1 activity *in vitro* but not in photoreceptors.** (A) Western blot evaluating expression of pS6<sup>Ser240/244</sup>, S6, and GAPDH (loading control) from untreated 84-31 cells or treated with AAV.eGFP or AAV.caRheb. Numerical values indicate biological replicates for each treatment condition. (B) Representative micrographs of retinal sections injected with AAV.eGFP alone (top panels) or with AAV.caRheb/AAV.eGFP (bottom panels) and stained with antibodies directed against pS6<sup>Ser240/244</sup>.

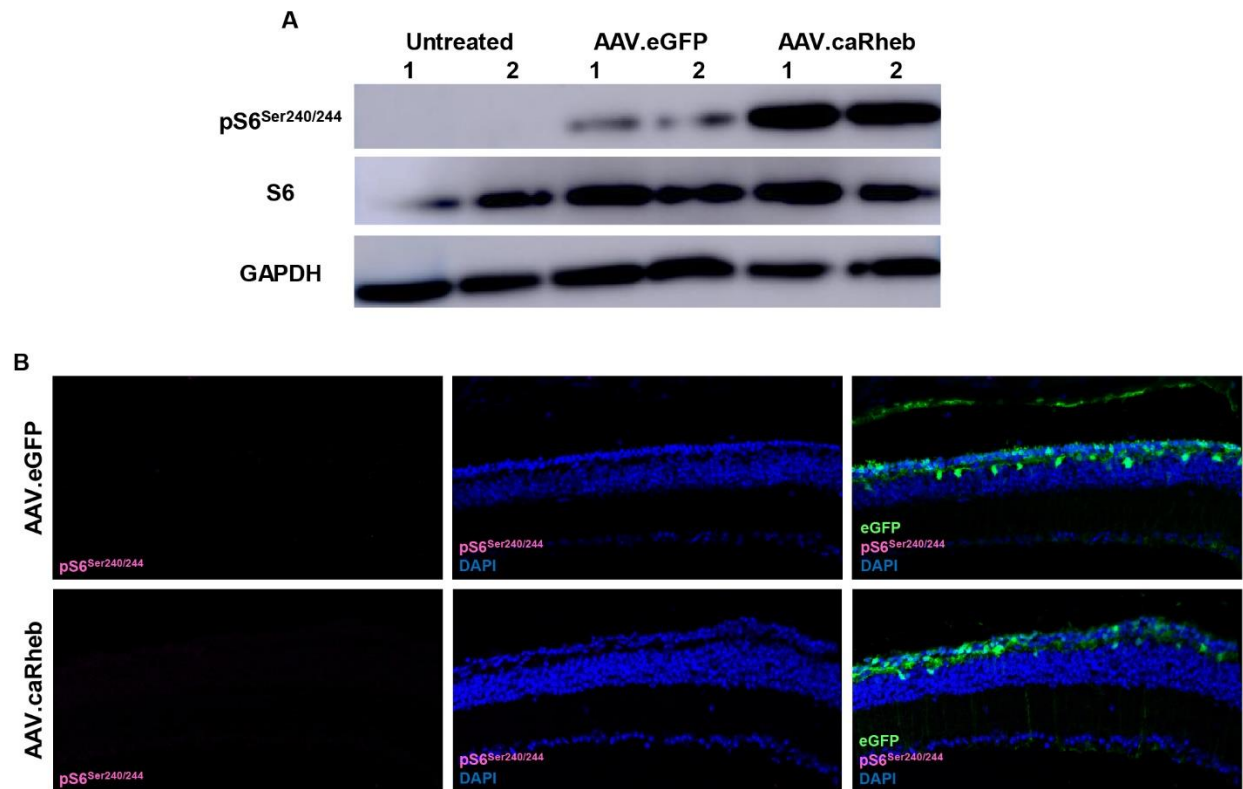

**Figure S2. Long-term *AKT3* gene transfer leads to retinal disorganization in wild-type animals.** C57Bl/6 (wild-type) mice received subretinal injection at PN13. **(A-B)** Retinal histology at PN125 reveals normal photoreceptor structure in animals treated with AAV.eGFP alone. **(C-D)** Animals treated with AAV.eGFP in combination with AAV.AKT3 display extensive disorganization of retinal layers and loss of photoreceptor numbers and structure.

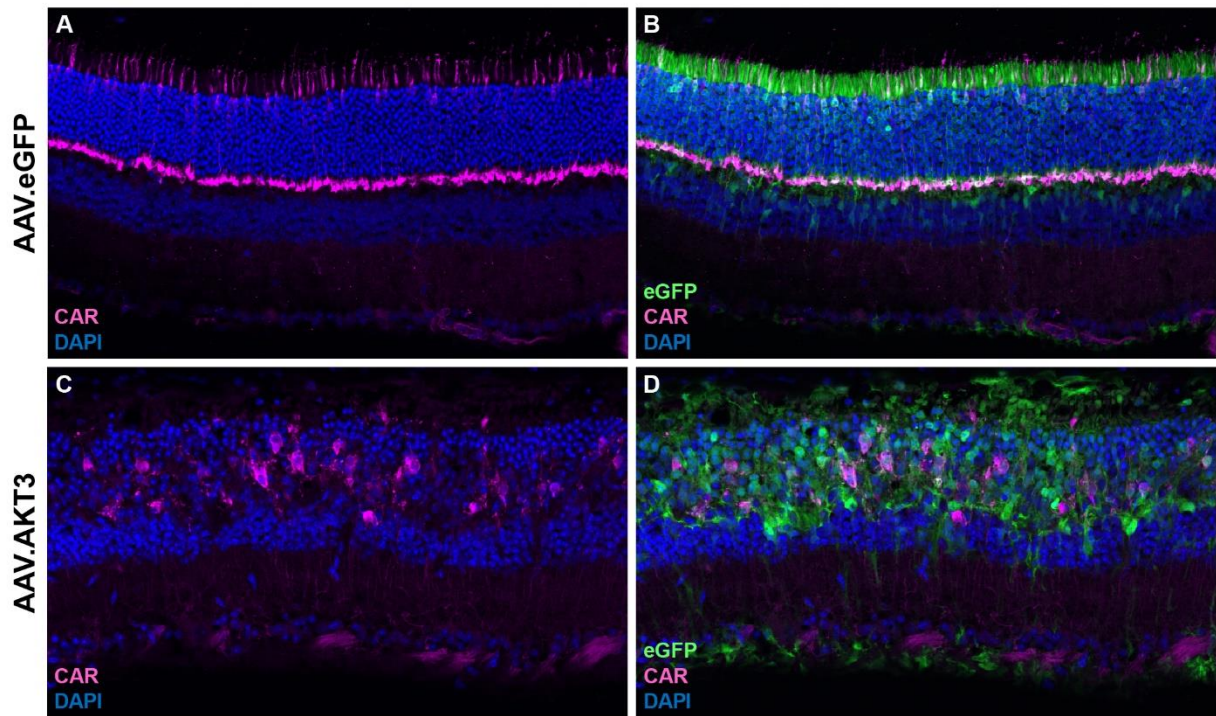

Supplement: mmc1.pdf [file mmc1.pdf]
